# Supplementary material for: A Preliminary Damage Assessment Using Dual Path Synthetic Aperture Radar Analysis for the M 6.4 Petrinja Earthquake (2020), Croatia
Source: MDPI journal article supplement (doi:10.3390/rs13122267), 2021-06-09
Supplement: s1 [file s1]

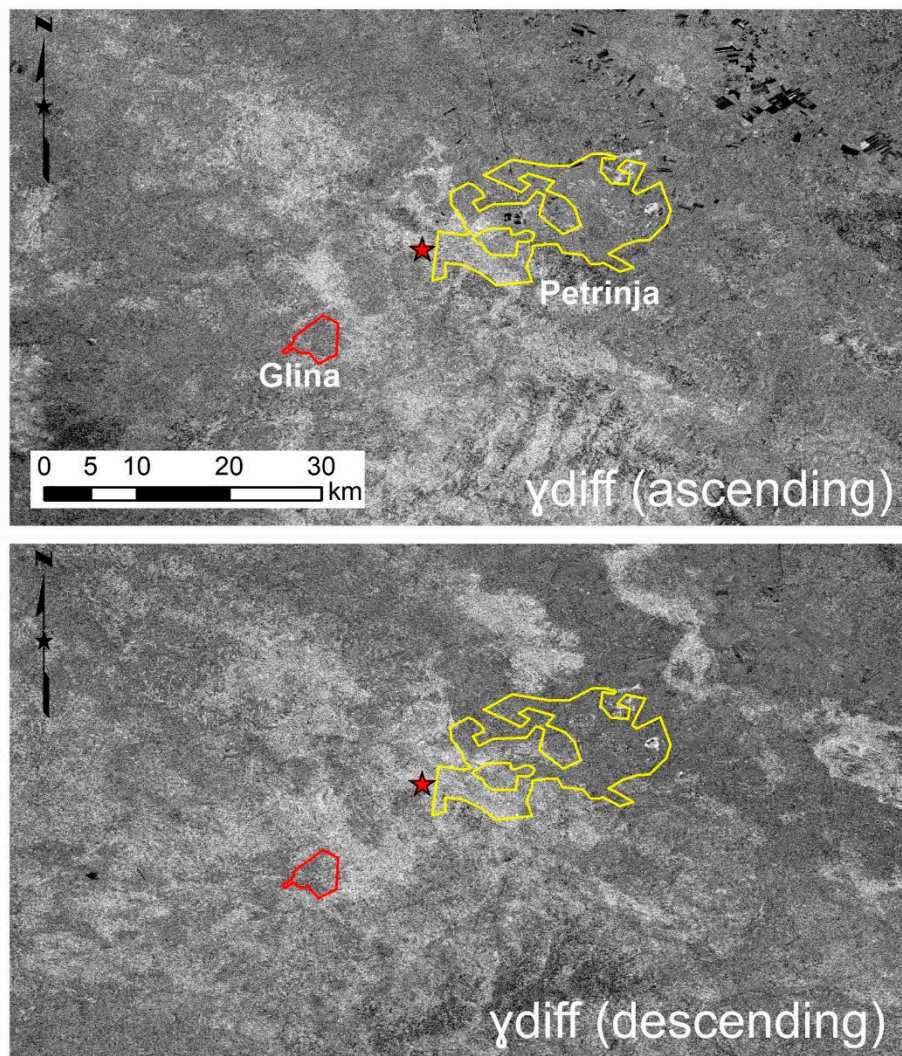

**Figure S1.** Differential coherence maps of the study area for both ascending (T 146) and descending (T 124) datasets. Yellow and red polygons are Petrinja and Glina, respectively.
